# Supplementary material for: Pharmaceutical and Microplastic Pollution before and during the COVID-19 Pandemic in Surface Water, Wastewater, and Groundwater
Source: MDPI journal article supplement (doi:10.3390/w14193082), 2022-09-30
Supplement: s1 [file s1]

## Supplementary Materials

*Review*

### **Pharmaceutical and microplastic pollution before and during the COVID-19 pandemic in surface water, wastewater, and groundwater**

Reza Pashaei<sup>1\*</sup>, Reda Dzingelevičienė<sup>1</sup>, Aida Bradauskaitė<sup>1</sup>, Alireza Lajevardipour<sup>2</sup>, Malgorzata Mlynska-Szultka<sup>1,3</sup>, Nerijus Dzingelevičius<sup>1</sup>, Saulius Raugelė<sup>1</sup>, Artūras Razbadauskas<sup>1</sup>, Sajjad Abbasi<sup>4,5</sup>, Robert M. Rees<sup>6</sup>, Bogusław Buszewski<sup>1,2,7</sup>

**Table S1.** PhAC residues before and during the COVID-19 pandemic in surface water.

| Location     | Sampling year | [N] | Type of pharmaceutical | Concentration (ng/L) | pH   | Depth (m) | Temperature (°C) | Analytical method | Reference |
|--------------|---------------|-----|------------------------|----------------------|------|-----------|------------------|-------------------|-----------|
| South Africa | 2013*         | 24  | Ibuprofen              | 84600                | 8.92 | 0.02      | 20±1             | HPLC-MS/MS        | [26]      |
| USA          | 2008*         | 27  | Caffeine               | 4200                 | N/A  | N/A       | N/A              | LC-MS/MS          | [27]      |
| USA          | 2008*         | 27  | Carbamazepine          | 1200                 | N/A  | N/A       | N/A              | LC-MS/MS          | [27]      |
| USA          | 2008*         | 27  | Ibuprofen              | 2800                 | N/A  | N/A       | N/A              | LC-MS/MS          | [27]      |
| Ghana        | 2021*         | 10  | Acetaminophen          | 2988                 | N/A  | N/A       | N/A              | HPLC-MS/MS        | [52]      |
| Ghana        | 2021*         | 10  | Ibuprofen              | 105.39               | N/A  | N/A       | N/A              | HPLC-MS/MS        | [52]      |
| Ghana        | 2021*         | 10  | Tramadol               | 105.11               | N/A  | N/A       | N/A              | HPLC-MS/MS        | [52]      |
| Ghana        | 2021*         | 10  | Diclofenac             | 100.91               | N/A  | N/A       | N/A              | HPLC-MS/MS        | [52]      |
| Ghana        | 2021*         | 10  | Furosemide             | 157.89               | N/A  | N/A       | N/A              | HPLC-MS/MS        | [52]      |
| Greece       | 2008*         | 6   | Diclofenac             | 432                  | 8.00 | N/A       | 21±1             | GC-MS             | [45]      |
| Sweden       | 2008*         | 7   | Carbamazepine          | 90                   | N/A  | 0.5       | N/A              | LC-MS/MS          | [46]      |
| Japan        | 2008*         | 109 | Caffeine               | 2400                 | N/A  | N/A       | N/A              | LC MS/MS, TSQ     | [47]      |
| Japan        | 2008*         | 109 | Crotamiton             | 1500                 | N/A  | N/A       | N/A              | LC MS/MS, TSQ     | [47]      |
| Japan        | 2008*         | 109 | Sulpiride              | 1400                 | N/A  | N/A       | N/A              | LC MS/MS, TSQ     | [47]      |
| South Korea  | 2016*         | 72  | Carbamazepine          | 206.7                | N/A  | N/A       | N/A              | LC-MS/MS          | [48]      |
| South Korea  | 2016*         | 72  | Sulfamethoxazole       | 113.2                | N/A  | N/A       | N/A              | LC-MS/MS          | [48]      |
| South Korea  | 2016*         | 72  | Naproxen               | 51.6                 | N/A  | N/A       | N/A              | LC-MS/MS          | [48]      |
| South Korea  | 2016*         | 72  | Clarithromycin         | 42.7                 | N/A  | N/A       | N/A              | LC-MS/MS          | [48]      |
| China        | 2015*         | 72  | Paracetamol            | 7024                 | 8.00 | N/A       | N/A              | HPLC-HESI-MS/MS   | [49]      |
| China        | 2015*         | 72  | Caffeine               | 8571                 | 8.00 | N/A       | N/A              | HPLC-HESI-MS/MS   | [49]      |
| Portugal     | 2016*         | 31  | Sertraline             | 304                  | N/A  | 1.00      | N/A              | UHPLC-TOF-MS      | [42]      |
| Portugal     | 2016*         | 31  | Diclofenac             | 51.8                 | N/A  | 1.00      | N/A              | UHPLC-TOF-MS      | [42]      |
| Portugal     | 2016*         | 31  | Gemfibrozil            | 77                   | N/A  | 1.00      | N/A              | UHPLC-TOF-MS      | [42]      |
| Portugal     | 2016*         | 31  | Ibersartan             | 161.9                | N/A  | 1.00      | N/A              | UHPLC-TOF-MS      | [42]      |
| Portugal     | 2016*         | 31  | Doxycycline            | 128.0                | N/A  | 1.00      | N/A              | UHPLC-TOF-MS      | [42]      |

\* Surface water

[N] = Number of samples

| Location | Sampling year | [N] | Type of pharmaceutical | Concentration (ng/L) | pH   | Depth (m) | Temperature (°C) | Analytical method | Reference |
|----------|---------------|-----|------------------------|----------------------|------|-----------|------------------|-------------------|-----------|
| Italy    | 2020*         | 328 | Ketoprofen             | 5.84                 | N/A  | N/A       | N/A              | LC-MS             | [43]      |
| UK       | 2017*         | 9   | Ibuprofen              | 6297                 | 8.00 | N/A       | 18±1             | UPTM-ESI-MS/MS    | [41]      |
| UK       | 2017*         | 9   | Paracetamol            | 916.88               | 8.00 | N/A       | 18±1             | UPTM-ESI-MS/MS    | [41]      |
| UK       | 2017*         | 9   | Diclofenac             | 250.8                | 8.00 | N/A       | 18±1             | UPTM-ESI-MS/MS    | [41]      |
| UK       | 2017*         | 9   | Trimethoprim           | 247.02               | 8.00 | N/A       | 18±1             | UPTM-ESI-MS/MS    | [41]      |
| UK       | 2017*         | 9   | Citalopram             | 42.93                | 8.00 | N/A       | 18±1             | UPTM-ESI-MS/MS    | [41]      |
| Chile    | 2013*         | 10  | Acetaminophen          | 48740                | N/A  | N/A       | N/A              | LC-MS/MS          | [38]      |
| Chile    | 2013*         | 10  | Diclofenac             | 15090                | N/A  | N/A       | N/A              | LC-MS/MS          | [38]      |
| Chile    | 2013*         | 10  | Ibuprofen              | 10050                | N/A  | N/A       | N/A              | LC-MS/MS          | [38]      |
| Uganda   | 2018*         | 75  | Sulfamethoxazole       | 5600                 | 8.35 | N/A       | 23±1             | HPLC              | [33]      |
| Uganda   | 2018*         | 75  | Trimethoprim           | 89                   | 8.35 | N/A       | 23±1             | HPLC              | [33]      |
| Uganda   | 2018*         | 75  | Tetracycline           | 70                   | 8.35 | N/A       | 23±1             | HPLC              | [33]      |
| Uganda   | 2018*         | 75  | Sulfacetamide          | 13                   | 8.35 | N/A       | 23±1             | HPLC              | [33]      |
| Uganda   | 2018*         | 75  | Ibuprofen              | 780                  | 8.35 | N/A       | 23±1             | HPLC              | [33]      |
| Nigeria  | 2018*         | 22  | Sulfamethoxazole       | 129000               | N/A  | N/A       | N/A              | HPLC-MS/MS        | [35]      |
| Nigeria  | 2018*         | 22  | Paracetamol            | 111000               | N/A  | N/A       | N/A              | HPLC-MS/MS        | [35]      |
| Lebanon  | 2016*         | 100 | Caffeine               | 2805                 | N/A  | N/A       | N/A              | LC-ESI-MS/MS      | [31]      |
| Lebanon  | 2016*         | 100 | Anhydroerythromycin    | 157                  | N/A  | N/A       | N/A              | LC-ESI-MS/MS      | [31]      |
| Lebanon  | 2016*         | 100 | Erythromycin           | 98                   | N/A  | N/A       | N/A              | LC-ESI-MS/MS      | [31]      |
| Lebanon  | 2016*         | 100 | Caffeine               | 57                   | N/A  | N/A       | N/A              | LC-ESI-MS/MS      | [31]      |
| Egypt    | 2018*         | 10  | Metformin              | 63                   | N/A  | N/A       | N/A              | UHPLC-MS/MS       | [56]      |
| Egypt    | 2018*         | 10  | Acetaminophen          | 144                  | N/A  | N/A       | N/A              | UHPLC-MS/MS       | [56]      |
| Egypt    | 2018*         | 10  | Amoxicillin            | 24                   | N/A  | N/A       | N/A              | UHPLC-MS/MS       | [56]      |
| Egypt    | 2018*         | 10  | Trimethoprim           | 116                  | N/A  | N/A       | N/A              | UHPLC-MS/MS       | [56]      |
| Egypt    | 2018*         | 10  | Tramadol               | 93                   | N/A  | N/A       | N/A              | UHPLC-MS/MS       | [56]      |
| Egypt    | 2018*         | 10  | Caffeine               | 41                   | N/A  | N/A       | N/A              | UHPLC-MS/MS       | [56]      |
| Egypt    | 2018*         | 10  | Metoprolol             | 8                    | N/A  | N/A       | N/A              | UHPLC-MS/MS       | [56]      |

\* Surface water

[N] = Number of samples

| Location   | Sampling year | [N] | Type of pharmaceutical | Concentration (ng/L) | pH   | Depth (m) | Temperature (°C) | Analytical method | Reference |
|------------|---------------|-----|------------------------|----------------------|------|-----------|------------------|-------------------|-----------|
| Egypt      | 2018*         | 10  | Carbamazepine          | 6                    | N/A  | N/A       | N/A              | UHPLC-MS/MS       | [56]      |
| Egypt      | 2018*         | 10  | Ibuprofen              | 26                   | N/A  | N/A       | N/A              | UHPLC-MS/MS       | [56]      |
| Egypt      | 2018*         | 10  | Valsartan              | 55                   | N/A  | N/A       | N/A              | UHPLC-MS/MS       | [56]      |
| Bangladesh | 2017*         | 20  | Metronidazole          | 13.51                | N/A  | N/A       | N/A              | HPLC-MS/MS        | [36]      |
| Bangladesh | 2017*         | 20  | Trimethoprim           | 17.20                | N/A  | N/A       | N/A              | HPLC-MS/MS        | [36]      |
| Malaysia   | 2016*         | 18  | Amoxicillin            | 4.44                 | 6.15 | 0.50      | 25±1             | ELISA             | [30]      |
| Malaysia   | 2016*         | 18  | Caffeine               | 32.47                | 6.15 | 0.50      | 25±1             | ELISA             | [30]      |
| Malaysia   | 2016*         | 18  | Ciprofloxacin          | 87.48                | 6.15 | 0.50      | 25±1             | ELISA             | [30]      |
| Malaysia   | 2016*         | 18  | Diclofenac             | 4.49                 | 6.15 | 0.50      | 25±1             | ELISA             | [30]      |
| Malaysia   | 2016*         | 18  | Sulfamethoxazole       | 71.81                | 6.15 | 0.50      | 25±1             | ELISA             | [30]      |
| Malaysia   | 2016*         | 18  | Triclosan              | 5.01                 | 6.15 | 0.50      | 25±1             | ELISA             | [30]      |
| Sri Lanka  | 2013*         | 19  | Diclofenac             | 80                   | N/A  | N/A       | N/A              | LC-MS/MS          | [40]      |
| Sri Lanka  | 2013*         | 19  | Ibuprofen              | 84                   | N/A  | N/A       | N/A              | LC-MS/MS          | [40]      |
| Sri Lanka  | 2013*         | 19  | Triclosan              | 5.85                 | N/A  | N/A       | N/A              | LC-MS/MS          | [40]      |
| Sri Lanka  | 2013*         | 19  | Trimethoprim           | 42.4                 | N/A  | N/A       | N/A              | LC-MS/MS          | [40]      |
| Cameroon   | 2018*         | 10  | Diclofenac             | 65                   | N/A  | N/A       | N/A              | LC-HRMS           | [44]      |
| Cameroon   | 2018*         | 10  | Carbamazepine          | 46                   | N/A  | N/A       | N/A              | LC-HRMS           | [44]      |
| Cameroon   | 2018*         | 10  | Sulfamethoxazole       | 104                  | N/A  | N/A       | N/A              | LC-HRMS           | [44]      |
| Cameroon   | 2018*         | 10  | Acetaminophen          | 12                   | N/A  | N/A       | N/A              | LC-HRMS           | [44]      |
| Ghana      | 2019*         | 18  | Trimethoprim           | 420                  | N/A  | N/A       | N/A              | HPLC              | [55]      |
| Ghana      | 2019*         | 18  | Amoxicillin            | 402                  | N/A  | N/A       | N/A              | HPLC              | [55]      |
| Ghana      | 2019*         | 18  | Cefuroxime             | 34                   | N/A  | N/A       | N/A              | HPLC              | [55]      |
| Ghana      | 2021*         | 10  | Azithromycin           | 10.46                | N/A  | N/A       | N/A              | HPLC-MS/MS        | [52]      |
| Ghana      | 2021*         | 10  | Clarithromycin         | 29.11                | N/A  | N/A       | N/A              | HPLC-MS/MS        | [52]      |
| Ghana      | 2021*         | 10  | Carbamazepine          | 6.44                 | N/A  | N/A       | N/A              | HPLC-MS/MS        | [52]      |
| Ghana      | 2021*         | 10  | Chloramphenicol        | 41.36                | N/A  | N/A       | N/A              | HPLC-MS/MS        | [52]      |
| Ghana      | 2019*         | 28  | Diclofenac             | 30                   | 6.50 | N/A       | N/A              | HPLC              | [63]      |
| Ghana      | 2019*         | 28  | Chloramphenicol        | 180                  | 6.50 | N/A       | N/A              | HPLC              | [63]      |

\* Surface water

[N] = Number of samples

| Location | Sampling year | [N] | Type of pharmaceutical | Concentration (ng/L) | pH  | Depth (m) | Temperature (°C) | Analytical method | Reference |
|----------|---------------|-----|------------------------|----------------------|-----|-----------|------------------|-------------------|-----------|
| Italy    | 2011*         | 56  | Ketoprofen             | 90                   | N/A | N/A       | N/A              | LC-MS/MS          | [66]      |
| China    | 2020*         | 6   | Citalopram             | 4.8                  | N/A | 0.5       | N/A              | LC-MS/MS          | [65]      |
| China    | 2020*         | 6   | Venlafaxin             | 54.2                 | N/A | 0.5       | N/A              | LC-MS/MS          | [65]      |
| China    | 2020*         | 6   | Sertraline             | 1.9                  | N/A | 0.5       | N/A              | LC-MS/MS          | [65]      |
| China    | 2017*         | 16  | Venlafaxin             | 22.9                 | N/A | 0.5       | N/A              | LC-MS/MS          | [64]      |
| China    | 2019*         | 12  | Tetracycline           | 5.27                 | N/A | 3         | N/A              | LC-MS/MS          | [67]      |
| China    | 2020*         | 12  | Tetracycline           | 1.52                 | N/A | 3         | N/A              | LC-MS/MS          | [67]      |
| China    | 2019*         | 12  | Sulfamerazine          | 0.79                 | N/A | 3         | N/A              | LC-MS/MS          | [67]      |
| China    | 2020*         | 12  | Sulfamerazine          | 0.06                 | N/A | 3         | N/A              | LC-MS/MS          | [67]      |
| China    | 2019*         | 12  | Doxycycline            | 9.44                 | N/A | 3         | N/A              | LC-MS/MS          | [67]      |
| China    | 2020*         | 12  | Doxycycline            | 0                    | N/A | 3         | N/A              | LC-MS/MS          | [67]      |
| China    | 2019*         | 12  | Ciprofloxacin          | 14.07                | N/A | 3         | N/A              | LC-MS/MS          | [67]      |
| China    | 2020*         | 12  | Ciprofloxacin          | 0                    | N/A | 3         | N/A              | LC-MS/MS          | [67]      |
| China    | 2019*         | 12  | Ofloxacin              | 2.12                 | N/A | 3         | N/A              | LC-MS/MS          | [67]      |
| China    | 2020*         | 12  | Ofloxacin              | 0                    | N/A | 3         | N/A              | LC-MS/MS          | [67]      |
| China    | 2019*         | 12  | Azithromycin           | 0                    | N/A | 3         | N/A              | LC-MS/MS          | [67]      |
| China    | 2020*         | 12  | Azithromycin           | 0.16                 | N/A | 3         | N/A              | LC-MS/MS          | [67]      |

\* Surface water

[N] = Number of samples



**Table S2.** PhAC residues before and during the COVID-19 pandemic in wastewater influent and effluent.

| Location     | Sampling year     | [N] | Type of pharmaceutical | Concentration (ng/L) | pH   | Depth (m) | Temperature (°C) | Analytical method | Reference |
|--------------|-------------------|-----|------------------------|----------------------|------|-----------|------------------|-------------------|-----------|
| South Africa | 2013 <sup>1</sup> | 9   | Ibuprofen              | 62820                | 7.24 | 0.02      | 21±1             | HPLC-MS/MS        | [26]      |
| South Africa | 2013 <sup>1</sup> | 9   | Caffeine               | 4480                 | 7.24 | 0.02      | 21±1             | HPLC-MS/MS        | [26]      |
| South Africa | 2013 <sup>1</sup> | 9   | Acetaminophen          | 5760                 | 7.24 | 0.02      | 21±1             | HPLC-MS/MS        | [26]      |
| South Africa | 2013 <sup>1</sup> | 9   | Sulfamethoxazole       | 34500                | 7.24 | 0.02      | 21±1             | HPLC-MS/MS        | [26]      |
| South Africa | 2013 <sup>1</sup> | 9   | Erythromycin           | 610                  | 7.24 | 0.02      | 21±1             | HPLC-MS/MS        | [26]      |
| South Africa | 2013 <sup>1</sup> | 9   | Carbamazepine          | 2210                 | 7.24 | 0.02      | 21±1             | HPLC-MS/MS        | [26]      |
| South Africa | 2018 <sup>1</sup> | 28  | Caffeine               | 60136                | N/A  | N/A       | N/A              | UHPLC-MS/MS       | [57]      |
| South Africa | 2018 <sup>1</sup> | 28  | Diclofenac             | 246.3                | N/A  | N/A       | N/A              | UHPLC-MS/MS       | [57]      |
| South Africa | 2018 <sup>1</sup> | 28  | Efavirenz              | 2169                 | N/A  | N/A       | N/A              | UHPLC-MS/MS       | [57]      |
| South Africa | 2018 <sup>1</sup> | 28  | Naproxen               | 546.1                | N/A  | N/A       | N/A              | UHPLC-MS/MS       | [57]      |
| South Africa | 2018 <sup>1</sup> | 28  | Paraxanthine           | 35286                | N/A  | N/A       | N/A              | UHPLC-MS/MS       | [57]      |
| South Africa | 2018 <sup>1</sup> | 28  | Salicylamide           | 563.50               | N/A  | N/A       | N/A              | UHPLC-MS/MS       | [57]      |
| South Africa | 2018 <sup>1</sup> | 28  | Sulfamethoxazole       | 2405                 | N/A  | N/A       | N/A              | UHPLC-MS/MS       | [57]      |
| South Africa | 2018 <sup>1</sup> | 28  | Triclocarban           | 276.1                | N/A  | N/A       | N/A              | UHPLC-MS/MS       | [57]      |
| South Africa | 2018 <sup>1</sup> | 28  | Valsartan              | 1289                 | N/A  | N/A       | N/A              | UHPLC-MS/MS       | [57]      |
| Australia    | 2013 <sup>1</sup> | 11  | Carbamazepine          | 685                  | N/A  | N/A       | N/A              | LC-MS/MS          | [111]     |
| Australia    | 2013 <sup>1</sup> | 11  | Venlafaxine            | 100                  | N/A  | N/A       | N/A              | LC-MS/MS          | [111]     |
| Australia    | 2013 <sup>1</sup> | 11  | Sertraline             | 241                  | N/A  | N/A       | N/A              | LC-MS/MS          | [111]     |
| Australia    | 2013 <sup>1</sup> | 11  | Fluoxetine             | 51.1                 | N/A  | N/A       | N/A              | LC-MS/MS          | [111]     |
| Australia    | 2013 <sup>1</sup> | 11  | Atenolol               | 300                  | N/A  | N/A       | N/A              | LC-MS/MS          | [111]     |
| Australia    | 2013 <sup>1</sup> | 11  | Sotalol                | 322                  | N/A  | N/A       | N/A              | LC-MS/MS          | [111]     |
| Australia    | 2013 <sup>1</sup> | 11  | Metoprolol             | 379                  | N/A  | N/A       | N/A              | LC-MS/MS          | [111]     |
| Australia    | 2013 <sup>1</sup> | 11  | Propranolol            | 151                  | N/A  | N/A       | N/A              | LC-MS/MS          | [111]     |
| Australia    | 2013 <sup>1</sup> | 11  | Chlorpheniramine       | 43.9                 | N/A  | N/A       | N/A              | LC-MS/MS          | [111]     |
| Australia    | 2013 <sup>1</sup> | 11  | Diphenhydramine        | 18.9                 | N/A  | N/A       | N/A              | LC-MS/MS          | [111]     |
| Australia    | 2013 <sup>1</sup> | 11  | Triclosan              | 3544                 | N/A  | N/A       | N/A              | LC-MS/MS          | [111]     |

<sup>1</sup> Influent<sup>2</sup> Effluent

[N] = Number of samples

| Location     | Sampling year     | [N] | Type of pharmaceutical | Concentration (ng/L) | pH   | Depth (m) | Temperature (°C) | Analytical method | Reference |
|--------------|-------------------|-----|------------------------|----------------------|------|-----------|------------------|-------------------|-----------|
| USA          | 2017 <sup>1</sup> | 77  | Sulfamethoxazole       | 1372.43              | N/A  | N/A       | N/A              | HPLC-MS           | [54]      |
| USA          | 2017 <sup>1</sup> | 77  | Erythromycin           | 85.52                | N/A  | N/A       | N/A              | HPLC-MS           | [54]      |
| USA          | 2017 <sup>1</sup> | 77  | Triclosan              | 313.20               | N/A  | N/A       | N/A              | HPLC-MS           | [54]      |
| USA          | 2017 <sup>1</sup> | 77  | Trimethoprim           | 668.76               | N/A  | N/A       | N/A              | HPLC-MS           | [54]      |
| Jordan       | 2017 <sup>1</sup> | 4   | Carbamazepine          | 1104                 | N/A  | N/A       | N/A              | LC-MS/MS          | [50]      |
| Jordan       | 2017 <sup>1</sup> | 4   | Sulfamethoxazole       | 96                   | N/A  | N/A       | N/A              | LC-MS/MS          | [50]      |
| Jordan       | 2017 <sup>1</sup> | 4   | Caffeine               | 155600               | N/A  | N/A       | N/A              | LC-MS/MS          | [50]      |
| Jordan       | 2017 <sup>1</sup> | 4   | Cotinine               | 4980                 | N/A  | N/A       | N/A              | LC-MS/MS          | [50]      |
| Jordan       | 2017 <sup>1</sup> | 4   | Acetaminophen          | 36700                | N/A  | N/A       | N/A              | LC-MS/MS          | [50]      |
| France       | 2015 <sup>1</sup> | 13  | Acetaminophen          | 96700                | N/A  | N/A       | N/A              | GC-MS             | [51]      |
| France       | 2015 <sup>1</sup> | 13  | Carbamazepine          | 937                  | N/A  | N/A       | N/A              | GC-MS             | [51]      |
| France       | 2015 <sup>1</sup> | 13  | Ketoprofen             | 6560                 | N/A  | N/A       | N/A              | GC-MS             | [51]      |
| Colombia     | 2016 <sup>1</sup> | 14  | Acetaminophen          | 39250                | N/A  | N/A       | N/A              | UHPLC-MS/MS       | [37]      |
| Colombia     | 2016 <sup>1</sup> | 14  | Azithromycin           | 6320                 | N/A  | N/A       | N/A              | UHPLC-MS/MS       | [37]      |
| China        | 2020 <sup>1</sup> | 6   | Fluoxetine             | 4.25                 | N/A  | 0.5       | N/A              | LC-MS/MS          | [65]      |
| China        | 2020 <sup>1</sup> | 6   | Citalopram             | 3.2                  | N/A  | 0.5       | N/A              | LC-MS/MS          | [65]      |
| China        | 2020 <sup>1</sup> | 6   | Venlafaxine            | 80.4                 | N/A  | 0.5       | N/A              | LC-MS/MS          | [65]      |
| China        | 2014 <sup>1</sup> | 5   | Fluoxetine             | 2.6                  | N/A  | 0.5       | N/A              | LC-MS/MS          | [99]      |
| South Africa | 2013 <sup>2</sup> | 9   | Ibuprofen              | 58710                | 7.24 | 0.02      | 21±1             | HPLC-MS/MS        | [26]      |
| South Africa | 2013 <sup>2</sup> | 9   | Caffeine               | 610                  | 7.24 | 0.02      | 21±1             | HPLC-MS/MS        | [26]      |
| South Africa | 2013 <sup>2</sup> | 9   | Erythromycin           | 160                  | 7.24 | 0.02      | 21±1             | HPLC-MS/MS        | [26]      |
| South Africa | 2013 <sup>2</sup> | 9   | Carbamazepine          | 910                  | 7.24 | 0.02      | 21±1             | HPLC-MS/MS        | [26]      |
| South Africa | 2018 <sup>2</sup> | 16  | Caffeine               | 4878                 | N/A  | N/A       | N/A              | UHPLC-MS/MS       | [57]      |
| South Africa | 2018 <sup>2</sup> | 16  | Diclofenac             | 243.6                | N/A  | N/A       | N/A              | UHPLC-MS/MS       | [57]      |
| South Africa | 2018 <sup>2</sup> | 16  | Efavirenz              | 2042                 | N/A  | N/A       | N/A              | UHPLC-MS/MS       | [57]      |
| South Africa | 2018 <sup>2</sup> | 16  | Naproxen               | 349.6                | N/A  | N/A       | N/A              | UHPLC-MS/MS       | [57]      |
| South Africa | 2018 <sup>2</sup> | 16  | Paraxanthine           | 8452                 | N/A  | N/A       | N/A              | UHPLC-MS/MS       | [57]      |
| South Africa | 2018 <sup>2</sup> | 16  | Salicylamide           | 112.9                | N/A  | N/A       | N/A              | UHPLC-MS/MS       | [57]      |

<sup>1</sup> Influent

<sup>2</sup> Effluent

[N] = Number of samples



| Location     | Sampling year     | [N] | Type of pharmaceutical | Concentration (ng/L) | pH  | Depth (m) | Temperature (°C) | Analytical method | Reference |
|--------------|-------------------|-----|------------------------|----------------------|-----|-----------|------------------|-------------------|-----------|
| South Africa | 2018 <sup>2</sup> | 16  | Sulfamethoxazole       | 504.4                | N/A | N/A       | N/A              | UHPLC-MS/MS       | [57]      |
| South Africa | 2018 <sup>2</sup> | 16  | Triclocarban           | 44.89                | N/A | N/A       | N/A              | UHPLC-MS/MS       | [57]      |
| South Africa | 2018 <sup>2</sup> | 16  | Valsartan              | 762.4                | N/A | N/A       | N/A              | UHPLC-MS/MS       | [57]      |
| India        | 2008 <sup>2</sup> | 18  | Cetirizine             | 2100000              | N/A | N/A       | N/A              | LC-ESI-MS/MS      | [29]      |
| India        | 2008 <sup>2</sup> | 18  | Ciprofloxacin          | 14000000             | N/A | N/A       | N/A              | LC-ESI-MS/MS      | [29]      |
| Egypt        | 2018 <sup>2</sup> | 10  | Metformin              | 5613                 | N/A | N/A       | N/A              | UHPLC-MS/MS       | [56]      |
| Egypt        | 2018 <sup>2</sup> | 10  | Acetaminophen          | 15947                | N/A | N/A       | N/A              | UHPLC-MS/MS       | [56]      |
| Egypt        | 2018 <sup>2</sup> | 10  | Amoxicillin            | 2038                 | N/A | N/A       | N/A              | UHPLC-MS/MS       | [56]      |
| Egypt        | 2018 <sup>2</sup> | 10  | Trimethoprim           | 2738                 | N/A | N/A       | N/A              | UHPLC-MS/MS       | [56]      |
| Egypt        | 2018 <sup>2</sup> | 10  | Tramadol               | 1103                 | N/A | N/A       | N/A              | UHPLC-MS/MS       | [56]      |
| Egypt        | 2018 <sup>2</sup> | 10  | Caffeine               | 855                  | N/A | N/A       | N/A              | UHPLC-MS/MS       | [56]      |
| Egypt        | 2018 <sup>2</sup> | 10  | Metoprolol             | 1089                 | N/A | N/A       | N/A              | UHPLC-MS/MS       | [56]      |
| Egypt        | 2018 <sup>2</sup> | 10  | Sulfamethoxazole       | 19                   | N/A | N/A       | N/A              | UHPLC-MS/MS       | [56]      |
| Egypt        | 2018 <sup>2</sup> | 10  | Erythromycin           | 275                  | N/A | N/A       | N/A              | UHPLC-MS/MS       | [56]      |
| Egypt        | 2018 <sup>2</sup> | 10  | Carbamazepine          | 342                  | N/A | N/A       | N/A              | UHPLC-MS/MS       | [56]      |
| Egypt        | 2018 <sup>2</sup> | 10  | Ibuprofen              | 6702                 | N/A | N/A       | N/A              | UHPLC-MS/MS       | [56]      |
| Egypt        | 2018 <sup>2</sup> | 10  | Valsartan              | 594                  | N/A | N/A       | N/A              | UHPLC-MS/MS       | [56]      |
| Australia    | 2013 <sup>2</sup> | 11  | Carbamazepine          | 702                  | N/A | N/A       | N/A              | LC-MS/MS          | [111]     |
| Australia    | 2013 <sup>2</sup> | 11  | Venlafaxine            | 511                  | N/A | N/A       | N/A              | LC-MS/MS          | [111]     |
| Australia    | 2013 <sup>2</sup> | 11  | Sertraline             | 36.7                 | N/A | N/A       | N/A              | LC-MS/MS          | [111]     |
| Australia    | 2013 <sup>2</sup> | 11  | Fluoxetine             | 16.2                 | N/A | N/A       | N/A              | LC-MS/MS          | [111]     |
| Australia    | 2013 <sup>2</sup> | 11  | Atenolol               | 75.5                 | N/A | N/A       | N/A              | LC-MS/MS          | [111]     |
| Australia    | 2013 <sup>2</sup> | 11  | Sotalol                | 209                  | N/A | N/A       | N/A              | LC-MS/MS          | [111]     |
| Australia    | 2013 <sup>2</sup> | 11  | Metoprolol             | 178                  | N/A | N/A       | N/A              | LC-MS/MS          | [111]     |
| Australia    | 2013 <sup>2</sup> | 11  | Propranolol            | 75.8                 | N/A | N/A       | N/A              | LC-MS/MS          | [111]     |
| Australia    | 2013 <sup>2</sup> | 11  | Chlorpheniramine       | 20.7                 | N/A | N/A       | N/A              | LC-MS/MS          | [111]     |
| Australia    | 2013 <sup>2</sup> | 11  | Diphenhydramine        | 29.8                 | N/A | N/A       | N/A              | LC-MS/MS          | [111]     |
| Australia    | 2013 <sup>2</sup> | 11  | Triclosan              | 5.4                  | N/A | N/A       | N/A              | LC-MS/MS          | [111]     |

<sup>1</sup> Influent

<sup>2</sup> Effluent

[N] = Number of samples

| Location | Sampling year     | [N] | Type of pharmaceutical | Concentration (ng/L) | pH  | Depth (m) | Temperature (°C) | Analytical method | Reference |
|----------|-------------------|-----|------------------------|----------------------|-----|-----------|------------------|-------------------|-----------|
| Iran     | 2019 <sup>2</sup> | 6   | Valsartan              | 8400                 | N/A | 0.10      | N/A              | LC-MS/MS          | [32]      |
| Iran     | 2019 <sup>2</sup> | 6   | Carbamazepine          | 19000                | N/A | 0.10      | N/A              | LC-MS/MS          | [32]      |
| Iran     | 2019 <sup>2</sup> | 6   | Caffeine               | 140000               | N/A | 0.10      | N/A              | LC-MS/MS          | [32]      |
| USA      | 2017 <sup>2</sup> | 77  | Sulfamethoxazole       | 1861.29              | N/A | N/A       | N/A              | HPLC-MS           | [54]      |
| USA      | 2017 <sup>2</sup> | 77  | Erythromycin           | 46.43                | N/A | N/A       | N/A              | HPLC-MS           | [54]      |
| USA      | 2017 <sup>2</sup> | 77  | Triclosan              | 121.86               | N/A | N/A       | N/A              | HPLC-MS           | [54]      |
| USA      | 2017 <sup>2</sup> | 77  | Trimethoprim           | 248.29               | N/A | N/A       | N/A              | HPLC-MS           | [54]      |
| Jordan   | 2017 <sup>2</sup> | 4   | Carbamazepine          | 856                  | N/A | N/A       | N/A              | LC-MS/MS          | [50]      |
| Jordan   | 2017 <sup>2</sup> | 4   | Sulfamethoxazole       | 96                   | N/A | N/A       | N/A              | LC-MS/MS          | [50]      |
| Jordan   | 2017 <sup>2</sup> | 4   | Caffeine               | 86                   | N/A | N/A       | N/A              | LC-MS/MS          | [50]      |
| Jordan   | 2017 <sup>2</sup> | 4   | Cotinine               | 78                   | N/A | N/A       | N/A              | LC-MS/MS          | [50]      |
| Jordan   | 2017 <sup>2</sup> | 4   | Acetaminophen          | 41                   | N/A | N/A       | N/A              | LC-MS/MS          | [50]      |
| France   | 2015 <sup>2</sup> | 13  | Acetaminophen          | 172                  | N/A | N/A       | N/A              | GC-MS             | [51]      |
| France   | 2015 <sup>2</sup> | 13  | Carbamazepine          | 357                  | N/A | N/A       | N/A              | GC-MS             | [51]      |
| France   | 2015 <sup>2</sup> | 13  | Ketoprofen             | 176                  | N/A | N/A       | N/A              | GC-MS             | [51]      |
| Colombia | 2016 <sup>2</sup> | 14  | Acetaminophen          | 29660                | N/A | N/A       | N/A              | UHPLC-MS/MS       | [37]      |
| Colombia | 2016 <sup>2</sup> | 14  | Azithromycin           | 3990                 | N/A | N/A       | N/A              | UHPLC-MS/MS       | [37]      |
| China    | 2020 <sup>2</sup> | 6   | Fluoxetine             | 1.05                 | N/A | 0.5       | N/A              | LC-MS/MS          | [65]      |
| China    | 2020 <sup>2</sup> | 6   | Citalopram             | 7.60                 | N/A | 0.5       | N/A              | LC-MS/MS          | [65]      |
| China    | 2020 <sup>2</sup> | 6   | Venlafaxine            | 87                   | N/A | 0.5       | N/A              | LC-MS/MS          | [65]      |
| China    | 2014 <sup>2</sup> | 5   | Fluoxetine             | 1.40                 | N/A | 0.5       | N/A              | LC-MS/MS          | [99]      |

<sup>1</sup> Influent

<sup>2</sup> Effluent

[N] = Number of samples



**Table S3.** PhAC residues before and during the COVID-19 pandemic in groundwater.

| Location | Sampling year     | [N]  | Type of pharmaceutical | Concentration (ng/L) | pH  | Depth (m) | Temperature (°C) | Analytical method | Reference |
|----------|-------------------|------|------------------------|----------------------|-----|-----------|------------------|-------------------|-----------|
| USA      | 2010 <sup>3</sup> | 1231 | Acetaminophen          | 1890                 | N/A | 61.00     | N/A              | HPLC-MS           | [25]      |
| USA      | 2010 <sup>3</sup> | 1231 | Caffeine               | 290                  | N/A | 61.00     | N/A              | HPLC-MS           | [25]      |
| USA      | 2010 <sup>3</sup> | 1231 | Carbamazepine          | 420                  | N/A | 61.00     | N/A              | HPLC-MS           | [25]      |
| USA      | 2010 <sup>3</sup> | 1231 | Codeine                | 214                  | N/A | 61.00     | N/A              | HPLC-MS           | [25]      |
| USA      | 2010 <sup>3</sup> | 1231 | Sulfamethoxazole       | 170                  | N/A | 61.00     | N/A              | HPLC-MS           | [25]      |
| USA      | 2010 <sup>3</sup> | 1231 | Trimethoprim           | 18                   | N/A | 61.00     | N/A              | HPLC-MS           | [25]      |
| Italy    | 2020 <sup>3</sup> | 328  | Ketoprofen             | 152.88               | N/A | N/A       | N/A              | LC-MS             | [43]      |
| Italy    | 2020 <sup>3</sup> | 328  | Azithromycin           | 82.46                | N/A | N/A       | N/A              | LC-MS             | [43]      |
| Italy    | 2020 <sup>3</sup> | 328  | Caffeine               | 65.92                | N/A | N/A       | N/A              | LC-MS             | [43]      |
| Italy    | 2020 <sup>3</sup> | 328  | Ibuprofen              | 10.54                | N/A | N/A       | N/A              | LC-MS             | [43]      |
| Italy    | 2020 <sup>3</sup> | 328  | Diclofenac             | 121.46               | N/A | N/A       | N/A              | LC-MS             | [43]      |
| Cameroon | 2018 <sup>3</sup> | 10   | Diclofenac             | 518                  | N/A | N/A       | N/A              | LC-HRMS           | [44]      |
| Cameroon | 2018 <sup>3</sup> | 10   | Carbamazepine          | 335                  | N/A | N/A       | N/A              | LC-HRMS           | [44]      |
| Cameroon | 2018 <sup>3</sup> | 10   | Sulfamethoxazole       | 1285                 | N/A | N/A       | N/A              | LC-HRMS           | [44]      |
| Cameroon | 2018 <sup>3</sup> | 10   | Acetaminophen          | 111                  | N/A | N/A       | N/A              | LC-HRMS           | [44]      |
| Nigeria  | 2018 <sup>3</sup> | 12   | Acetaminophen          | 1                    | N/A | N/A       | N/A              | UPLC              | [35]      |
| Nigeria  | 2018 <sup>3</sup> | 12   | Sulfamethoxazole       | 1                    | N/A | N/A       | N/A              | UPLC              | [35]      |
| Nigeria  | 2018 <sup>3</sup> | 12   | Caffeine               | 4                    | N/A | N/A       | N/A              | UPLC              | [35]      |
| Nigeria  | 2018 <sup>3</sup> | 12   | Amoxicillin            | 44                   | N/A | N/A       | N/A              | UPLC              | [35]      |
| Nigeria  | 2018 <sup>3</sup> | 12   | Carbamazepine          | 1                    | N/A | N/A       | N/A              | UPLC              | [35]      |
| Nigeria  | 2018 <sup>3</sup> | 12   | Naproxen               | 1                    | N/A | N/A       | N/A              | UPLC              | [35]      |
| Nigeria  | 2018 <sup>3</sup> | 12   | Diclofenac             | 1                    | N/A | N/A       | N/A              | UPLC              | [35]      |
| Nigeria  | 2018 <sup>3</sup> | 12   | Ibuprofen              | 4                    | N/A | N/A       | N/A              | UPLC              | [35]      |

<sup>3</sup>Groundwater

[N] = Number of samples

| Location | Sampling year     | [N] | Type of pharmaceutical | Concentration (ng/L) | pH  | Depth (m) | Temperature (°C) | Analytical method | Reference |
|----------|-------------------|-----|------------------------|----------------------|-----|-----------|------------------|-------------------|-----------|
| China    | 2019 <sup>3</sup> | 12  | Tetracycline           | 2.63                 | N/A | 3         | N/A              | LC-MS/MS          | [67]      |
| China    | 2020 <sup>3</sup> | 12  | Tetracycline           | 2.11                 | N/A | 3         | N/A              | LC-MS/MS          | [67]      |
| China    | 2019 <sup>3</sup> | 12  | Sulfamerazine          | 0                    | N/A | 3         | N/A              | LC-MS/MS          | [67]      |
| China    | 2020 <sup>3</sup> | 12  | Sulfamerazine          | 0.02                 | N/A | 3         | N/A              | LC-MS/MS          | [67]      |
| China    | 2019 <sup>3</sup> | 12  | Doxycycline            | 5.73                 | N/A | 3         | N/A              | LC-MS/MS          | [67]      |
| China    | 2020 <sup>3</sup> | 12  | Doxycycline            | 4.35                 | N/A | 3         | N/A              | LC-MS/MS          | [67]      |
| China    | 2019 <sup>3</sup> | 12  | Ciprofloxacin          | 14.83                | N/A | 3         | N/A              | LC-MS/MS          | [67]      |
| China    | 2020 <sup>3</sup> | 12  | Ciprofloxacin          | 1.84                 | N/A | 3         | N/A              | LC-MS/MS          | [67]      |
| China    | 2019 <sup>3</sup> | 12  | Ofloxacin              | 7.56                 | N/A | 3         | N/A              | LC-MS/MS          | [67]      |
| China    | 2020 <sup>3</sup> | 12  | Ofloxacin              | 3.06                 | N/A | 3         | N/A              | LC-MS/MS          | [67]      |
| China    | 2019 <sup>3</sup> | 12  | Azithromycin           | 0                    | N/A | 3         | N/A              | LC-MS/MS          | [67]      |
| China    | 2020 <sup>3</sup> | 12  | Azithromycin           | 0.10                 | N/A | 3         | N/A              | LC-MS/MS          | [67]      |

<sup>3</sup>Groundwater

[N] = Number of samples



**Table S4.** MP particles before and during the COVID-19 pandemic in surface water.

| Location  | Sampling year         | [N] | Type of polymer | Concentration (Particles/m³) | Shape    | Size    | Color       | Instrumental method | Reference |
|-----------|-----------------------|-----|-----------------|------------------------------|----------|---------|-------------|---------------------|-----------|
| Tunisia   | 2019 <sup>1</sup>     | 28  | PE              | 453                          | Fiber    | N/A     | Transparent | ATR-FTIR            | [73]      |
|           |                       |     | PP              |                              | Film     |         | White       |                     |           |
|           |                       |     | PETE            |                              | Fragment |         | Blue        |                     |           |
|           |                       |     | COP             |                              | Green    |         |             |                     |           |
|           |                       |     | NL              |                              | Yellow   |         |             |                     |           |
|           |                       |     | PS              |                              | Red      |         |             |                     |           |
| China     | 2013 <sup>1</sup>     | 15  | PE              | 1245.8                       | Fiber    | Class 2 | Transparent | Raman spectroscopy  | [74]      |
|           |                       |     | PP              | 1170.8                       | Film     | Class 3 | White       |                     |           |
|           |                       |     | PVC             | 955.6                        | Granules | Class 4 | Black       |                     |           |
|           |                       |     | PTFE            | 680.0                        |          | Class 5 |             |                     |           |
| Indonesia | 2019 <sup>1,2,3</sup> | 8   | PE              | 43.11                        | Fiber    | N/A     | Transparent | FTIR                | [75]      |
|           |                       |     | PP              | 12.56                        | Film     |         | White       |                     |           |
|           |                       |     | PETE            | 34.63                        | Fragment |         | Blue        |                     |           |
|           |                       |     | PS              | Pellet                       | Yellow   |         |             |                     |           |
|           |                       |     |                 | Foam                         | Red      |         |             |                     |           |
|           |                       |     |                 |                              |          | Black   |             |                     |           |

\* Class 1: 0.05–0.5 mm; Class 2: 0.5–1 mm; Class 3: 1–2.5 mm; Class 4: 2.5–5 mm; Class 5: >5 mm

<sup>1</sup> Surface water

<sup>2</sup> Middle water

<sup>3</sup> Bottom water

| Location    | Sampling year     | [N] | Type of polymer | Concentration (Particles/m <sup>3</sup> ) | Shape    | Size    | Color | Instrumental method | Reference |
|-------------|-------------------|-----|-----------------|-------------------------------------------|----------|---------|-------|---------------------|-----------|
| South Korea | 2017 <sup>1</sup> | 9   | PE              | 293                                       | Fiber    | Class 1 | N/A   | FTIR                | [76]      |
|             |                   |     | PP              | 5242                                      | Film     |         |       |                     |           |
|             |                   |     | PVC             |                                           | Fragment |         |       |                     |           |
|             |                   |     | PES             |                                           | Spherule |         |       |                     |           |
|             |                   |     | PUR             |                                           |          |         |       |                     |           |
|             |                   |     | AC              |                                           |          |         |       |                     |           |
|             |                   |     | PEVA            |                                           |          |         |       |                     |           |
|             |                   |     | PAS             |                                           |          |         |       |                     |           |
|             |                   |     | AL              |                                           |          |         |       |                     |           |
|             |                   |     | PA              |                                           |          |         |       |                     |           |
|             |                   |     | PS              |                                           |          |         |       |                     |           |
| China       | 2019 <sup>1</sup> | 10  | PE              | 0.93                                      | Fiber    | Class 2 | N/A   | SEM                 | [77]      |
|             |                   |     | PP              | 0.497                                     | Fragment |         |       |                     |           |
|             |                   |     | PS              |                                           |          |         |       |                     |           |
| China       | 2019 <sup>1</sup> | 20  | PE              | 0.00987                                   | Fiber    | Class 1 | N/A   | FTIR                | [78]      |
|             |                   |     | PP              |                                           | Film     | Class 2 |       |                     |           |
|             |                   |     | PS              |                                           | Fragment | Class 4 |       |                     |           |
|             |                   |     |                 |                                           | Pellet   |         |       |                     |           |

\* Class 1: 0.05–0.5 mm; Class 2: 0.5–1 mm; Class 3: 1–2.5 mm; Class 4: 2.5–5 mm; Class 5: >5 mm

<sup>1</sup> Surface water



| Location    | Sampling year     | [N] | Type of polymer              | Concentration (Particles/m <sup>3</sup> ) | Shape             | Size     | Color                                                      | Instrumental method | Reference |
|-------------|-------------------|-----|------------------------------|-------------------------------------------|-------------------|----------|------------------------------------------------------------|---------------------|-----------|
| Iran        | 2016 <sup>1</sup> | 33  | N/A                          | 0.000042                                  | Fiber             | Class 2  | Transparent                                                | TGA                 | [79]      |
|             | 2019 <sup>1</sup> |     |                              |                                           |                   | Spherule | Class 3<br>Class 5<br>Blue<br>Red<br>Gray<br>Black         |                     |           |
| India       | 2019 <sup>1</sup> | 60  | PETE                         | 0.000004                                  | N/A               | Class 5  | Brown                                                      | FTIR                | [80]      |
|             |                   |     | PVC<br>NL<br>PES<br>AC<br>RA |                                           |                   |          | Blue<br>Green<br>Yellow<br>Red<br>Purple<br>Clear<br>Black |                     |           |
| South Korea | 2018 <sup>1</sup> | 21  | PP<br>PES<br>PUR<br>SI<br>PS | 42.9                                      | Fiber<br>Fragment | Class 1  | N/A                                                        | FTIR                | [81]      |

\* Class 1: 0.05–0.5 mm; Class 2: 0.5–1 mm; Class 3: 1–2.5 mm; Class 4: 2.5–5 mm; Class 5: >5 mm

<sup>1</sup> Surface water

| Location | Sampling year     | [N] | Type of polymer | Concentration (Particles/m <sup>3</sup> ) | Shape    | Size    | Color       | Instrumental method | Reference |
|----------|-------------------|-----|-----------------|-------------------------------------------|----------|---------|-------------|---------------------|-----------|
| Portugal | 2016 <sup>1</sup> | 43  | PE              | 1265                                      | Fiber    | N/A     | N/A         | FTIR                | [82]      |
|          |                   |     | PP              |                                           | Film     |         |             |                     |           |
|          |                   |     | PETE            |                                           | Fragment |         |             |                     |           |
|          |                   |     | SBR             |                                           | Pellet   |         |             |                     |           |
|          |                   |     | CA              |                                           | Foam     |         |             |                     |           |
|          |                   |     | PTFE            |                                           |          |         |             |                     |           |
|          |                   |     | PVA             |                                           |          |         |             |                     |           |
|          |                   |     | PMMA            |                                           |          |         |             |                     |           |
|          |                   |     | PEA             |                                           |          |         |             |                     |           |
|          |                   |     | EA              |                                           |          |         |             |                     |           |
|          |                   |     | PS              |                                           |          |         |             |                     |           |
| China    | 2018 <sup>1</sup> | 6   | PE              | 967                                       | Fiber    | Class 1 | Transparent | Micro-Raman         | [83]      |
|          |                   |     | PP              |                                           | Fragment | Class 2 | White       |                     |           |
|          |                   |     | PETE            |                                           | Pellet   | Class 3 | Blue        |                     |           |
|          |                   |     | PA              |                                           |          | Class 4 | Green       |                     |           |
|          |                   |     | PS              |                                           |          |         | Red         |                     |           |
|          |                   |     |                 |                                           |          |         | Black       |                     |           |

\* Class 1: 0.05–0.5 mm; Class 2: 0.5–1 mm; Class 3: 1–2.5 mm; Class 4: 2.5–5 mm; Class 5: >5 mm

<sup>1</sup> Surface water

| Location | Sampling year     | [N] | Type of polymer | Concentration (Particles/m <sup>3</sup> ) | Shape    | Size    | Color | Instrumental method | Reference |
|----------|-------------------|-----|-----------------|-------------------------------------------|----------|---------|-------|---------------------|-----------|
| Turkey   | 2009 <sup>1</sup> | 24  | PE              | 0.331                                     | Fiber    | Class 1 | N/A   | FTIR                | [84]      |
|          | 2010 <sup>1</sup> |     | PP              | 0.925                                     | Film     | Class 2 |       |                     |           |
|          | 2012 <sup>1</sup> |     | PETE            | 0.413                                     | Fragment | Class 3 |       |                     |           |
|          | 2014 <sup>1</sup> |     | ABS             | 0.350                                     | Pellet   | Class 4 |       |                     |           |
|          | 2017 <sup>1</sup> |     | PBPE            | 0.794                                     | Foam     | Class 5 |       |                     |           |
|          | 2018 <sup>1</sup> |     | DP              | 0.725                                     |          |         |       |                     |           |
|          | 2019 <sup>1</sup> |     | PVC             | 0.750                                     |          |         |       |                     |           |
|          | 2020 <sup>1</sup> |     | HFFR            | 0.944                                     |          |         |       |                     |           |
|          |                   |     | PA              |                                           |          |         |       |                     |           |
|          |                   |     | PVA             |                                           |          |         |       |                     |           |
|          |                   |     | ABR             |                                           |          |         |       |                     |           |
|          |                   |     | PS              |                                           |          |         |       |                     |           |
|          |                   |     | PAN             |                                           |          |         |       |                     |           |
| Greece   | 2019 <sup>1</sup> | 6   | PE              | 27.73                                     | Film     | Class 1 | N/A   | FTIR                | [85]      |
|          |                   |     | PP              |                                           | Fragment | Class 2 |       |                     |           |
|          |                   |     |                 |                                           | Filament | Class 3 |       |                     |           |
|          |                   |     |                 |                                           |          | Class 4 |       |                     |           |
|          |                   |     |                 |                                           |          | Class 5 |       |                     |           |

\* Class 1: 0.05–0.5 mm; Class 2: 0.5–1 mm; Class 3: 1–2.5 mm; Class 4: 2.5–5 mm; Class 5: >5 mm

<sup>1</sup> Surface water

| Location | Sampling year     | [N] | Type of polymer | Concentration (Particles/m <sup>3</sup> ) | Shape    | Size    | Color       | Instrumental method | Reference |
|----------|-------------------|-----|-----------------|-------------------------------------------|----------|---------|-------------|---------------------|-----------|
| Italy    | 2018 <sup>1</sup> | 30  | PE              | 13                                        | Fiber    | Class 1 | Transparent | Py-GC-MS            | [86]      |
|          |                   |     | PP              |                                           | Fragment | Class 2 | Brown       |                     |           |
|          |                   |     | PVC             |                                           | Pellet   | Class 3 | White       |                     |           |
|          |                   |     | PUR             |                                           | Foam     | Class 4 | Blue        |                     |           |
|          |                   |     | PS              |                                           | Foils    |         | Green       |                     |           |
|          |                   |     |                 |                                           | Line     |         | Yellow      |                     |           |
|          |                   |     |                 |                                           |          |         | Red         |                     |           |
|          |                   |     |                 |                                           |          |         | Black       |                     |           |
| USA      | 2015 <sup>1</sup> | 30  | PE              | 0.287                                     | Fiber    | N/A     | N/A         | FTIR                | [87]      |
|          |                   |     | PP              |                                           | Film     |         |             |                     |           |
|          |                   |     | PETE            |                                           | Fragment |         |             |                     |           |
|          |                   |     | PA              |                                           | Foam     |         |             |                     |           |
|          |                   |     | NL              |                                           | Spherule |         |             |                     |           |
|          |                   |     | PUR             |                                           |          |         |             |                     |           |
|          |                   |     | AR              |                                           |          |         |             |                     |           |
|          |                   |     | AN              |                                           |          |         |             |                     |           |
|          |                   |     | PS              |                                           |          |         |             |                     |           |
|          |                   |     | CP              |                                           |          |         |             |                     |           |

\* Class 1: 0.05–0.5 mm; Class 2: 0.5–1 mm; Class 3: 1–2.5 mm; Class 4: 2.5–5 mm; Class 5: >5 mm

<sup>1</sup> Surface water

| Location | Sampling year     | [N] | Type of polymer | Concentration (Particles/m <sup>3</sup> ) | Shape    | Size    | Color       | Instrumental method | Reference |
|----------|-------------------|-----|-----------------|-------------------------------------------|----------|---------|-------------|---------------------|-----------|
| Latvia   | 2018 <sup>1</sup> | 44  | PE              | 4.43                                      | Fiber    | Class 2 | Transparent | FTIR                | [88]      |
|          |                   |     | PP              |                                           | Film     | Class 3 | Brown       |                     |           |
|          |                   |     | PETE            |                                           | Fragment | Class 4 | White       |                     |           |
|          |                   |     | NL              |                                           | Foam     | Class 5 | Blue        |                     |           |
|          |                   |     | PES             |                                           | Beads    |         | Orange      |                     |           |
|          |                   |     | PEVA            |                                           |          |         | Green       |                     |           |
|          |                   |     | PS              |                                           |          |         | Yellow      |                     |           |
|          |                   |     |                 |                                           |          |         | Purple      |                     |           |
|          |                   |     |                 |                                           |          |         | Pink        |                     |           |
|          |                   |     |                 |                                           |          |         | Gray        |                     |           |
|          |                   |     |                 |                                           |          |         | Black       |                     |           |
| Norway   | 2018 <sup>1</sup> | 20  | PE              | 0.00084                                   | Fiber    | Class 1 | Transparent | FTIR, SEM           | [89]      |
|          |                   |     | PP              |                                           | Film     | Class 3 | Blue        |                     |           |
|          |                   |     | PES             |                                           | Fragment | Class 4 |             |                     |           |
|          |                   |     | PA              |                                           | Granules |         |             |                     |           |
|          |                   |     | PVA             |                                           | Line     |         |             |                     |           |
|          |                   |     | PS              |                                           |          |         |             |                     |           |

\* Class 1: 0.05–0.5 mm; Class 2: 0.5–1 mm; Class 3: 1–2.5 mm; Class 4: 2.5–5 mm; Class 5: >5 mm

<sup>1</sup> Surface water

| Location | Sampling year     | [N] | Type of polymer | Concentration (Particles/m <sup>3</sup> ) | Shape    | Size    | Color       | Instrumental method | Reference |
|----------|-------------------|-----|-----------------|-------------------------------------------|----------|---------|-------------|---------------------|-----------|
| USA      | 2016 <sup>1</sup> | 96  | PP              | 1.93                                      | Fiber    | Class 3 | N/A         | FTIR                | [90]      |
|          |                   |     | LDPE            | 2.61                                      | Film     | Class 4 |             |                     |           |
|          |                   |     | PS              | 1.58                                      | Fragment |         |             |                     |           |
|          |                   |     |                 | 2.71                                      | Pellet   |         |             |                     |           |
|          |                   |     |                 | 2.57                                      | Foam     |         |             |                     |           |
|          |                   |     |                 | 5.67                                      |          |         |             |                     |           |
|          |                   |     |                 | 1.00                                      |          |         |             |                     |           |
|          |                   |     |                 | 1.27                                      |          |         |             |                     |           |
|          |                   |     |                 | 0.55                                      |          |         |             |                     |           |
|          |                   |     |                 | 0.42                                      |          |         |             |                     |           |
| Pakistan | 2021 <sup>1</sup> |     | PP              | 88                                        | Fiber    | N/A     | Transparent | ATR-FTIR            | [110]     |
|          |                   |     | HDPE            |                                           | Beads    |         | Red         |                     |           |
|          |                   |     | EVA             |                                           | Fragment |         | White       |                     |           |
|          |                   |     | LDPE            |                                           |          |         | Blue        |                     |           |
|          |                   |     | NI              |                                           |          |         | Green       |                     |           |
|          |                   |     | PMMA            |                                           |          |         | Yellow      |                     |           |
|          |                   |     | PETE            |                                           |          |         | Pink        |                     |           |
|          |                   |     |                 |                                           |          |         | Black       |                     |           |

\* Class 1: 0.05–0.5 mm; Class 2: 0.5–1 mm; Class 3: 1–2.5 mm; Class 4: 2.5–5 mm; Class 5: >5 mm

<sup>1</sup> Surface water

| Location   | Sampling year     | [N] | Type of polymer | Concentration (Particles/m <sup>3</sup> ) | Shape    | Size    | Color       | Instrumental method | Reference |
|------------|-------------------|-----|-----------------|-------------------------------------------|----------|---------|-------------|---------------------|-----------|
| Bangladesh | 2020 <sup>1</sup> | 34  | PE              | 0.00057                                   | Fiber    | Class 3 | Transparent | μ-FTIR              | [36]      |
|            |                   |     | PP              |                                           | Fragment | Class 4 | Red         |                     |           |
|            |                   |     |                 |                                           | Film     | Class 5 | White       |                     |           |
|            |                   |     |                 |                                           | Pellet   |         | Blue        |                     |           |
|            |                   |     |                 |                                           |          |         | Green       |                     |           |
|            |                   |     |                 |                                           |          |         | Black       |                     |           |
| Iran       | 2021 <sup>1</sup> | 19  | PE              | 43                                        | Fiber    |         | Black       | FTIR                | [92]      |
|            |                   |     | PA              |                                           | Fragment |         | White       |                     |           |
|            |                   |     | PS              |                                           | Film     |         | Blue        |                     |           |
|            |                   |     |                 |                                           | Foam     |         | Gray        |                     |           |
|            |                   |     |                 |                                           |          |         | Brown       |                     |           |
|            |                   |     |                 |                                           |          |         | Transparent |                     |           |
|            |                   |     |                 |                                           |          |         | Red         |                     |           |
|            |                   |     |                 |                                           |          |         | Green       |                     |           |
|            |                   |     |                 |                                           |          |         | Yellow      |                     |           |

\* Class 1: 0.05–0.5 mm; Class 2: 0.5–1 mm; Class 3: 1–2.5 mm; Class 4: 2.5–5 mm; Class 5: >5 mm

<sup>1</sup> Surface water
